1 **Regional replacement of SARS-CoV-2 variant BA.1 with BA.2 as observed through**  
2 **wastewater surveillance**

3  
4 Alexandria B. Boehm<sup>1\*</sup>, Bridgette Hughes<sup>2</sup>, Marlene K. Wolfe<sup>3</sup>, Bradley J. White<sup>2</sup>, Dorothea  
5 Duong<sup>2</sup>, Vikram Chan-Herur<sup>2</sup>

6  
7 1. Department of Civil & Environmental Engineering, Stanford University, 473 Via Ortega,  
8 Stanford, CA, USA, 94305

9 2. Verily Life Sciences, South San Francisco, CA, USA, 94080

10 3. Gangarosa Department of Environmental Health, Rollins School of Public Health, Emory  
11 University, 1518 Clifton Rd, Atlanta, GA, USA, 30322

12  
13 \* Corresponding author: Alexandria Boehm, Dept Civil and Environmental Engineering, Stanford  
14 University, Stanford, California, USA, 94305, [aboehm@stanford.edu](mailto:aboehm@stanford.edu), 650-724-9128

15  
16 **Graphical Abstract**

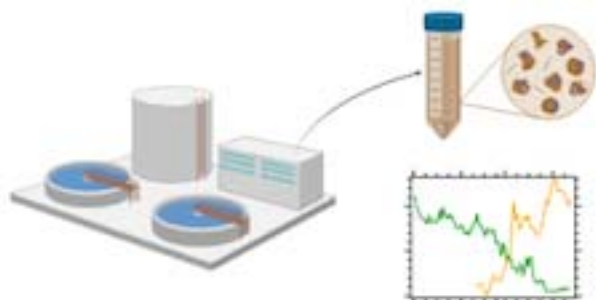

17  
18  
19

20 **Abstract**

21  
22 An understanding of circulating SARS-CoV-2 variants can inform pandemic response, vaccine  
23 development, disease epidemiology, and use of monoclonal antibody treatments. We developed  
24 custom assays targeting characteristic mutations in SARS-CoV-2 variants Omicron BA.1 and  
25 BA.2 and confirmed their sensitivity and specificity in silico and *in vitro*. We then applied these  
26 assays to daily wastewater solids samples from eight publicly owned treatment works in the  
27 greater Bay Area of California, USA, over four months to obtain a spatially and temporally  
28 intensive data set. We documented regional replacement of BA.1 with BA.2 in agreement with,  
29 and ahead of, clinical sequencing data. This study highlights the utility of wastewater  
30 surveillance for real time tracking of SARS-CoV-2 variant circulation.

31 **Key words:** Omicron, wastewater, SARS-CoV-2, wastewater-based epidemiology

32  
33 **Synopsis:** Wastewater surveillance was used to document regional emergence of SARS-CoV-  
34 2 variant Omicron BA.2 ahead of clinical surveillance.  
35

## 36 Introduction

37 Knowing when a new SARS-CoV-2 variant arrives locally is of utmost importance to pandemic  
38 response in order to ensure a rapid response to new features of the virus. In late 2021, the  
39 Omicron variant emerged in South Africa and quickly spread to Europe and then North America  
40 during a period of time during which Delta was the dominant circulating variant. The Omicron  
41 variant resulted in a virus more transmissible and less susceptible to therapeutics and vaccines  
42 than previous lineages<sup>1</sup>. Given these implications for public health, timely identification of its  
43 introduction into a new community was critical. Variant identification is usually accomplished  
44 through sequencing of clinical specimens, but the time between specimen collection, and the  
45 return of sequencing information to public health officials is approximately two weeks. For  
46 example, outbreak.info<sup>2</sup>, a website that provides analysis and visualization of SARS-CoV-2  
47 clinical sequences deposited in GISAID<sup>3,4</sup>, stresses data are unreliable and incomplete during  
48 the 1-2 week window preceding the query date.

49  
50 Wastewater represents a biological composite sample from the contributing community. It  
51 contains feces, urine, sputum, mucus, blood, vomitus, and any other excretion that goes down a  
52 drain into the sewer network. Global investigations have illustrated that SARS-CoV-2 RNA  
53 concentrations, whether measured by RT-QPCR or digital RT-PCR, or in the liquid or solid  
54 phase of wastewater, correlates well with laboratory-confirmed incident COVID-19 cases in the  
55 associated sewersheds<sup>5-8</sup>. A number of studies have illustrated that circulating or novel variants  
56 can be identified in wastewater using RT-PCR assays that target a characteristic variant  
57 mutation<sup>9-11</sup> and by sequencing SARS-CoV-2<sup>12</sup>. We previously developed targeted RT-PCR  
58 assays for characteristic mutations in Alpha, Mu, Lambda, Delta, and Omicron BA.1, and  
59 showed that the concentrations of these mutations, normalized by a pan-SARS-CoV-2 N gene  
60 target is strongly correlated to the fraction of clinical specimens classified as the associated  
61 variant<sup>10,13</sup> at two publicly owned treatment works (POTWs). Here, we extend that previous work

62 by developing and testing two new assays, one that targets characteristic mutations in the BA.2  
63 sublineage of Omicron and another that targets a set of mutations present in both BA.1 and  
64 BA.2, and then applying them to wastewater samples collected daily at eight POTW in the  
65 greater Bay Area, California, USA. Results presented here were available publicly within 24  
66 hours of sample collection via our website ([wbe.stanford.edu](http://wbe.stanford.edu)), and these data allowed us to  
67 observe near real-time regional replacement of BA.1 with BA.2.

68

## 69 **Materials and Methods**

70

71 **Characteristic spike mutation assay development.** Digital RT-PCR assays were designed to  
72 target the BA.2 characteristic mutation LPPA24S (a 9 bp deletion), and a region of 5 adjacent  
73 SNPs common to BA.1 and BA.2 (S477N,T478K,Q493R,Q498R,Y505H, hereafter S:477-505).  
74 The del143-145 assay targeting a mutation present in BA.1 was developed in a similar manner  
75 described elsewhere<sup>10</sup>. According to sequences deposited in GISAID and accessed via  
76 outbreak.info (accessed 16 April 2022), the LPPA24S mutation is present in 92% of BA.2  
77 genomes, including sublineages, (hereafter BA.2\*) and 0.003% of BA.1 genomes, including  
78 sublineages, (hereafter BA.1\*) globally whereas the del143-145 mutation is present in 93%  
79 BA.1\* and 0% BA.2\* genomes, globally (Table S1). Assays were developed *in silico* using  
80 Primer3Plus (<https://primer3plus.com/>) (Table S2).

81

82 Primers and probe sequences (Table 1) were screened for specificity *in silico* using NCBI  
83 BLAST, and then tested *in vitro* against various respiratory viruses and gRNA from wild-type  
84 (WT) SARS-CoV-2 and its variants (see SI). Viral RNA was used undiluted as template in digital  
85 droplet RT-PCR with mutation primer and probes. The concentration of gRNA used for *in vitro*  
86 specificity testing was approximately 275 copies per well.

87

88 The sensitivity and specificity of the mutation assays were further tested by diluting target  
89 variant gRNA (Table S1) in no (0 copies), low (100 copies), and high (10,000 copies)  
90 background of WT SARS-CoV-2 gRNA.

91

92 **Wastewater samples.** Eight POTWs serving populations of the Greater Bay Area and  
93 Sacramento, California, USA were included in the study. They serve between 66,000 and 1.5  
94 million people; further descriptions are elsewhere.<sup>14</sup>

95

96 50 mL of settled solids was collected each day from each POTW between 1 January 2022 and  
97 12 or 13 April 2022, during the period of time when Omicron BA.2 emerged in the region.  
98 Detailed sample collection methods are provided elsewhere<sup>14</sup> and in the SI. Samples were  
99 immediately stored at 4°C and transported to the laboratory by a courier service where  
100 processing began within 6 h of collection. Between 94 and 103 samples from each POTW  
101 were included in the analysis (total of 810).

102

103 RNA was extracted from 10 replicate aliquots of each dewatered settled solids sample and PCR  
104 inhibitors were removed<sup>14</sup> (see SI). RNA was processed immediately to measure concentrations  
105 of the N gene of SARS-CoV-2, the BA.1\* characteristic mutation del143-145<sup>10</sup>, the BA.2\*  
106 characteristic mutation (LPPA24S), pepper mild mottle virus (PMMoV), and bovine coronavirus  
107 (BCoV) recovery using digital droplet RT-PCR methods<sup>14,15</sup>. The N gene target is present in all  
108 variants and is a pan-SARS-CoV-2 gene target. PMMoV is highly abundant in human stool and  
109 wastewater globally<sup>16,17</sup> and is used as an internal recovery for the wastewater samples<sup>18</sup>.

110 BCoV was spiked into the samples and used as an additional recovery control; all samples were  
111 required to have greater than 10% BCoV recovery. RNA extraction and PCR negative and  
112 positive controls were included to ensure no contamination. Extracted RNA samples from one  
113 POTW (SJ) were then stored at -80°C between 1 and 7 days before they were analyzed for

114 S:477-505 and the N gene. Each of the 10 replicate RNA extracts was run in its own well, and  
115 the 10 wells were merged for analysis. Wastewater data are available publicly at the Stanford  
116 Digital Repository (<https://doi.org/10.25740/cf848zx9249>); results below are reported as  
117 suggested in the EMMI guidelines<sup>19</sup>.

118  
119 **ddRT-PCR.** The ddRT-PCR methods applied to wastewater solids to measure PMMoV and  
120 BCoV are provided in detail elsewhere<sup>14</sup>. The N gene and del143-145 mutation were  
121 multiplexed along with an S gene assay (not reported herein). LPPA24S mutation was  
122 multiplexed in an assay along with an influenza A and RSV N gene target (only LPPA24S  
123 reported herein). The S:477-505 mutation was multiplexed with the N gene and a characteristic  
124 mutation in Delta (not reported). Each 96-well PCR plate of wastewater samples included PCR  
125 and extraction positive and negative controls. Additional details of the PCR methods are  
126 provided in the SI.

127  
128 QuantaSoft™ Analysis Pro Software (Bio-Rad, version 1.0.596) was used for thresholding. In  
129 order for a sample to be recorded as positive, it had to have at least three positive droplets. For  
130 the wastewater solid samples, three positive droplets across ten merged wells corresponds to a  
131 concentration between ~500-1000 copies per g (cp/g); the range in values is a result of the  
132 range in the equivalent mass of dry solids added to the wells.

133  
134 Concentrations of RNA targets were converted to concentrations per dry weight of solids in units  
135 of copies/g dry weight using dimensional analysis. Dry weight of dewatered solids was  
136 determined by oven drying<sup>20</sup>. The total error is reported as standard deviations and includes the  
137 errors associated with the Poisson distribution and the variability among the 10 replicates.

138

139 **Variants present in regional clinical specimens.** The 7-d, centered, rolling average  
140 proportion of clinical specimens sequenced from California classified as Omicon BA.1\* and  
141 BA.2\* as a function of specimen collection data were acquired from GISAID<sup>3,4</sup> on 21 April 2022.

142  
143 **Statistics.** We normalized mutation concentrations by N gene concentrations to represent the  
144 fraction of total SARS-CoV-2 RNA (represented by the N gene assay target which is conserved  
145 across variants) that comes from the variant; hereafter referred to as relative mutation  
146 concentration. We used Kendall's tau to test for associations between the 5-d trimmed  
147 smoothed average relative concentrations and the proportion of clinical specimens assigned to  
148 the corresponding variants as the two variables were not normally distributed (Shapiro Wilk test,  
149  $p < 0.05$  for all). The daily measured relative concentration was matched to the 7-d, centered,  
150 rolling average fraction of clinical specimens classified as the associated variant obtained from  
151 GISAID. All analysis was carried in R Studio version 1.4.1106.

152

153

## 154 **Results and Discussion**

155 **Variant mutation assay specificity.** *In silico* analysis indicated no cross reactivity between  
156 LPPA24S (targeting BA.2\*) and S:477-505 (targeting BA.1\* and BA.2\*) assays and deposited  
157 sequences in NCBI. When challenged against a respiratory virus panel and various non-target  
158 SARS-CoV-2 variant gRNA no cross reactivity was observed; the assays amplified gRNA from  
159 BA.2, and BA.1 and BA.2, respectively. Positive controls and NTCs run on sample plates were  
160 positive and negative. When target gRNA was diluted into a background of low and high non-  
161 target gRNA from WT SARS-CoV-2; measurements were similar when there was no, low, or  
162 high background gRNA (Figure S1). Results indicate the new mutation assays are specific and  
163 sensitive. Wolfe et al.<sup>10</sup> showed the del143-145 (targeting BA.1) assay was sensitive and  
164 specific.

165

166 **Variant RNA concentrations in wastewater solids.** All positive and negative controls were  
167 positive and negative, respectively, indicating assays performed well and without contamination.  
168 BCoV recoveries were higher than 10% and PMMoV concentrations within the expected range  
169 for the POTW suggesting an efficient and acceptable recovery of RNA during RNA extraction  
170 (Figure S2).

171

172 Across all eight POTWs a common pattern in N, del143-145, and LPPA24S concentrations is  
173 observed. Between 1 Jan and late Feb to mid-March 2022, N and del143-145 concentrations  
174 are approximately the same, and both decrease from  $10^6$  cp/g to  $10^4$  cp/g (Figure 1). The two  
175 order of magnitude decrease is coincident with a decline in laboratory-confirmed incident  
176 COVID-19 cases in the sewersheds after the winter Omicron surge in the region (case data not  
177 shown). In late Feb to mid-March until mid-April, both N and LPPA24S concentrations increase  
178 from  $10^3$  cp/g to  $10^5$  cp/g, while del143-145 concentrations decrease from  $10^4$  cp/g to  $10^2$  cp/g  
179 or non-detect. LPPA24S concentrations are similar to those of N at the POTWs during that  
180 same time period.

181

182 The ratios del143-145/N and LPPA24S/N describe the concentrations of the mutations in  
183 relation to a conserved gene target. As a mutation's relative concentration approaches 1, it  
184 suggests that the variant associated with the mutation may be dominant in the wastewater.  
185 Del143-145 relative concentration was a maximum and close to 1 at most POTWs at the  
186 beginning of the time series (1 January 2022) and then fell to nearly 0 by mid-April 2022 (Figure  
187 2). At the same time, LPPA24S relative concentration increased from 0 when it was first  
188 measured to near 1 at all POTWs. Depending on POTW, the date on which the LPPA24S  
189 relative concentration surpassed that of del143-145 ranged from 26 February to 19 March  
190 (Table S3). This date was earliest (26 Feb) at Ocean, located in San Francisco, and latest at Gil



191 and Sac; the date is positively correlated with the distance from Ocean ( $r=0.9$ ,  $p<0.05$ ,  $n=8$ )  
192 suggesting a spatial pattern in BA.2\* emergence. Regional replacement of BA.1\* with BA.2\*  
193 appears to be complete at all POTWs by the end of the times series as the del143-145 relative  
194 concentrations are close to 0 and LPPA24S relative concentrations approach 1. At times,  
195 relative concentrations may exceed 1; this may be due to variability in the performance of the  
196 digital RT-PCR assays. It is important to note that the relative concentrations do not incorporate  
197 measurement error of the numerator or denominator.

198  
199 At SJ, we measured the concentration of an additional set of adjacent mutations present in both  
200 BA.1 and BA.2 (S:477-505) (Figure 1). S:477-505 concentrations agree well with the N  
201 concentrations during a period of time when BA.1\* was dominant (prior to mid-March) and when  
202 BA.2\* was dominant (thereafter).

203  
204 del143-145 and LPPA24S relative concentrations at each POTW are positively and significantly  
205 correlated with the fraction of clinical cases in California assigned as BA.1\* and BA.2\*,  
206 respectively (Table S4). Tau between relative del143-145 concentrations and proportion of  
207 cases assigned as BA.1\* ranged from 0.51 at Gil to 0.81 at SAC (median tau = 0.68, all  $p<10^{-7}$ ,  
208  $n = 94-103$ ). Tau between relative LPPA24S concentrations and proportion of cases assigned  
209 as BA.2\* ranged from 0.67 at Gil to 0.90 at SAC (median tau = 0.75, all  $p<10^{-5}$ ,  $n = 58-62$ ). Tau  
210 values were similar when calculated using raw relative concentrations (see SI). State level  
211 clinical data suggest proportion of cases caused by BA.2\* exceeds that of BA.1\* after 21 March  
212 (Figure 3), later than any wastewater suggests this occurred regionally. Ideally, these analyses  
213 should be carried out using data on clinical variants in the sewersheds of the eight POTWs, but  
214 such data is not readily available, so we had to rely on state-level data.

215

216 State-level clinical sample sequencing data on variant occurrence is typically 1-2 weeks delayed  
217 owing to the time required for laboratory processing and reporting. In addition, there can be  
218 large uncertainties in the proportion estimates preceding the data for which the most recent data  
219 are available. This is illustrated in Figure 3 where we highlight the approximate time period for  
220 which data were incomplete on 14 April 2022, when wastewater measurements for the last date  
221 in our data series (12 or 13 April 2022) were available publicly on our website  
222 ([wbe.stanford.edu](http://wbe.stanford.edu)). During this same time period, wastewater data suggest BA.2\* is near 100%  
223 and BA.1\* is near 0%, which a week later (when data were downloaded from GISAID on 21  
224 April 2022) was confirmed by clinical sequencing data. This highlights an important advantage  
225 of using wastewater surveillance for variant tracking.

226  
227 Real-time estimates of variant abundance with high spatial resolution, such as those from  
228 wastewater surveillance, could allow clinicians and regulators to identify the most effective  
229 treatment for a particular community. The monoclonal antibody therapy sotrovimab provides a  
230 recent and practical example. Sotrovimab was granted emergency use authorization by the US  
231 FDA for treatment of infection by variants including BA.1, but not BA.2. As BA.2 took over, its  
232 use was discontinued by multi-state HHS region blocks, informed by clinical sequencing data.  
233 While sotrovimab was allowed for use in California until March 30, our data suggest BA.2  
234 became the dominant variant in the Bay Area weeks prior, but before BA.2 had taken over all of  
235 California and HHS region 9. Real-time wastewater variant estimates could have allowed the  
236 drug's use to be targeted spatially and temporally to maximize effectiveness.

237  
238 **Acknowledgements.** This work is supported by the CDC Foundation. Numerous people  
239 contributed to sample collection and case data acquisition, including Srividhya Ramamoorthy  
240 (Sac), Michael Cook (Sac), Ursula Bigler (Sac), James Noss (Sac), Lisa C. Thompson (Sac),  
241 Payak Sarkar (SJ), Noel Enoki (SJ), and Amy Wong (SJ), Lily Chan (Ocean), the Oceanside

242 plant operations personnel, Karin North (PA), Armando Guizar (PA), Saeid Vaziry (Gil), Chris  
243 Vasquez (Gil), Alo Kauravlla (Sun), Maria Gawat (SVCW), Tiffany Ishaya (SVCW), and Jeromy  
244 Miller (Dav). This study was performed on the ancestral and unceded lands of the Muwekma  
245 Ohlone people. We pay our respects to them and their Elders, past and present, and are  
246 grateful for the opportunity to live and work here. The graphic abstract was made using  
247 Biorender (biorender.com).

248  
249 **Supporting Information.** Additional methods, Tables S1-S5, Figures S1-S3. This paper has  
250 been previously submitted to medRxiv, a preprint server for Health Sciences. The preprint can  
251 be cited as: XXXX (to be provided).

252  
253 **Competing Interests.** BH, DD, VC-H and BW are employees of Verily Life Sciences.

254

255  
256  
257  
258  
259  
260  
261  
262  
263  
264  
265  
266  
267  
268  
269  
270  
271  
272  
273  
274  
275  
276  
277  
278  
279  
280  
281  
282  
283  
284  
285  
286  
287  
288  
289  
290  
291  
292  
293  
294  
295  
296  
297  
298  
299  
300  
301  
302  
303  
304  
305

## References

- (1) Viana, R.; Moyo, S.; Amoako, D. G.; Tegally, H.; Scheepers, C.; Althaus, C. L.; Anyaneji, U. J.; Bester, P. A.; Boni, M. F.; Chand, M.; Choga, W. T.; Colquhoun, R.; Davids, M.; Deforche, K.; Doolabh, D.; du Plessis, L.; Engelbrecht, S.; Everatt, J.; Giandhari, J.; Giovanetti, M.; Hardie, D.; Hill, V.; Hsiao, N.-Y.; Iranzadeh, A.; Ismail, A.; Joseph, C.; Joseph, R.; Koopile, L.; Kosakovsky Pond, S. L.; Kraemer, M. U. G.; Kuate-Lere, L.; Laguda-Akingba, O.; Lesetedi-Mafoko, O.; Lessells, R. J.; Lockman, S.; Lucaci, A. G.; Maharaj, A.; Mahlangu, B.; Maponga, T.; Mahlakwane, K.; Makatini, Z.; Marais, G.; Maruapula, D.; Masupu, K.; Matshaba, M.; Mayaphi, S.; Mbhele, N.; Mbulawa, M. B.; Mendes, A.; Mlisana, K.; Mnguni, A.; Mohale, T.; Moir, M.; Moruisi, K.; Mosepele, M.; Motsatsi, G.; Motswaledi, M. S.; Mphoyakgosi, T.; Msomi, N.; Mwangi, P. N.; Naidoo, Y.; Ntuli, N.; Nyaga, M.; Olubayo, L.; Pillay, S.; Radibe, B.; Ramphal, Y.; Ramphal, U.; San, J. E.; Scott, L.; Shapiro, R.; Singh, L.; Smith-Lawrence, P.; Stevens, W.; Strydom, A.; Subramoney, K.; Tebeila, N.; Tshiabuila, D.; Tsui, J.; van Wyk, S.; Weaver, S.; Wibmer, C. K.; Wilkinson, E.; Wolter, N.; Zarebski, A. E.; Zuze, B.; Goedhals, D.; Preiser, W.; Treurnicht, F.; Venter, M.; Williamson, C.; Pybus, O. G.; Bhiman, J.; Glass, A.; Martin, D. P.; Rambaut, A.; Gaseitsiwe, S.; von Gottberg, A.; de Oliveira, T. Rapid Epidemic Expansion of the SARS-CoV-2 Omicron Variant in Southern Africa. *Nature* **2022**, 603 (7902), 679–686. <https://doi.org/10.1038/s41586-022-04411-y>.
- (2) Mullen, J. L.; Tsueng, G.; Latif, A. A.; Alkuzweny, M.; Cano, M.; Haag, E.; Zhou, J.; Zeller, M.; Hufbauer, E.; Matteson, N.; Andersen, K. G.; Wu, C.; Su, A. I.; Gangavarapu, K.; Hughes, L. D. <https://outbreak.info/>.
- (3) Elbe, S.; Buckland-Merrett, G. Data, Disease and Diplomacy: GISAID's Innovative Contribution to Global Health. *Global Challenges* **2017**, 1 (1), 33–46. <https://doi.org/10.1002/gch2.1018>.
- (4) Shu, Y.; McCauley, J. GISAID: Global Initiative on Sharing All Influenza Data – from Vision to Reality. *Eurosurveillance* **2017**, 22 (13). <https://doi.org/10.2807/1560-7917.ES.2017.22.13.30494>.
- (5) Peccia, J.; Zulli, A.; Brackney, D. E.; Grubaugh, N. D.; Kaplan, E. H.; Casanovas-Massana, A.; Ko, A. I.; Malik, A. A.; Wang, D.; Wang, M.; Warren, J. L.; Weinberger, D. M.; Omer, S. B. SARS-CoV-2 RNA Concentrations in Primary Municipal Sewage Sludge as a Leading Indicator of COVID-19 Outbreak Dynamics. *Nature Biotechnology* **2020**, 38, 1164–1167.
- (6) Feng, S.; Roguet, A.; McClary-Gutierrez, J. S.; Newton, R. J.; Kloczko, N.; Meiman, J. G.; McLellan, S. L. Evaluation of Sampling, Analysis, and Normalization Methods for SARS-CoV-2 Concentrations in Wastewater to Assess COVID-19 Burdens in Wisconsin Communities. *ACS ES&T Water* **2021**, 1 (8), 1955–1965. <https://doi.org/10.1021/acsestwater.1c00160>.
- (7) Kim, S.; Kennedy, L. C.; Wolfe, M. K.; Criddle, C. S.; Duong, D. H.; Topol, A.; White, B. J.; Kantor, R. S.; Nelson, K. L.; Steele, J. A.; Langlois, K.; Griffith, J. F.; Zimmer-Faust, A. G.; McLellan, S. L.; Schussman, M. K.; Ammerman, M.; Wigginton, K. R.; Bakker, K. M.; Boehm, A. B. SARS-CoV-2 RNA Is Enriched by Orders of Magnitude in Primary Settled Solids Relative to Liquid Wastewater at Publicly Owned Treatment Works. *Environ. Sci.: Water Res. Technol.* **2022**. <https://doi.org/10.1039/D1EW00826A>.
- (8) Fernandez-Cassi, X.; Scheidegger, A.; Bänziger, C.; Cariti, F.; Corzon, A. T.; Ganesanandamoorthy, P.; Lemaitre, J. C.; Ort, C.; Julian, T. R.; Kohn, T. Wastewater Monitoring Outperforms Case Numbers as a Tool to Track COVID-19 Incidence Dynamics When Test Positivity Rates Are High. *Water Research* **2021**, 117252. <https://doi.org/10.1016/j.watres.2021.117252>.
- (9) Lee, W. L.; Imakaev, M.; Armas, F.; McElroy, K. A.; Gu, X.; Duvall, C.; Chandra, F.;

- 306 Chen, H.; Leifels, M.; Mendola, S.; Floyd-O'Sullivan, R.; Powell, M. M.; Wilson, S. T.;  
307 Berge, K. L. J.; Lim, C. Y. J.; Wu, F.; Xiao, A.; Moniz, K.; Ghaeli, N.; Matus, M.;  
308 Thompson, J.; Alm, E. J. Quantitative SARS-CoV-2 Alpha Variant B.1.1.7 Tracking in  
309 Wastewater by Allele-Specific RT-QPCR. *Environ. Sci. Technol. Lett.* **2021**, *8* (8), 675–  
310 682. <https://doi.org/10.1021/acs.estlett.1c00375>.
- 311 (10) Wolfe, M. K.; Hughes, B.; Duong, D.; Chan-Herur, V.; Wigginton, W. K.; White, B. J.;  
312 Boehm, A. B. Detection of SARS-CoV-2 Variants Mu, Beta, Gamma, Lambda, Delta,  
313 Alpha, and Omicron in Wastewater Settled Solids Using Mutation-Specific Assays Is  
314 Associated with Regional Detection of Variants in Clinical Samples. *Applied and*  
315 *Environmental Microbiology* *0* (0), e00045-22. <https://doi.org/10.1128/aem.00045-22>.
- 316 (11) Yaniv, K.; Ozer, E.; Kushmaro, A. SARS-CoV-2 Variants of Concern, Gamma (P.1) and  
317 Delta (B.1.617), Sensitive Detection and Quantification in Wastewater Employing Direct  
318 RT-QPCR. *medRxiv* **2021**, 2021.07.14.21260495.  
319 <https://doi.org/10.1101/2021.07.14.21260495>.
- 320 (12) Crits-Christoph Alexander; Kantor Rose S.; Olm Matthew R.; Whitney Oscar N.; Al-  
321 Shayeb Basem; Lou Yue Clare; Flamholz Avi; Kennedy Lauren C.; Greenwald Hannah;  
322 Hinkle Adrian; Hetzel Jonathan; Spitzer Sara; Koble Jeffery; Tan Asako; Hyde Fred;  
323 Schroth Gary; Kuersten Scott; Banfield Jillian F.; Nelson Kara L.; Pettigrew Melinda M.  
324 Genome Sequencing of Sewage Detects Regionally Prevalent SARS-CoV-2 Variants.  
325 *mBio* *12* (1), e02703-20. <https://doi.org/10.1128/mBio.02703-20>.
- 326 (13) Yu, A.; Hughes, B.; Wolfe, M.; Leon, T.; Duong, D.; Rabe, A.; Kennedy, L.; Ravuri, S.;  
327 White, B.; Wigginton, K. R.; Boehm, A.; Vugia, D. Estimating Relative Abundance of Two  
328 SARS-CoV-2 Variants through Wastewater Surveillance at Two Large Metropolitan Sites.  
329 *Emerging Infect. Dis.* **2022**, *28* (5), 940–947.
- 330 (14) Wolfe, M. K.; Topol, A.; Knudson, A.; Simpson, A.; White, B.; Duc, V.; Yu, A.; Li, L.;  
331 Balliet, M.; Stoddard, P.; Han, G.; Wigginton, K. R.; Boehm, A. High-Frequency, High-  
332 Throughput Quantification of SARS-CoV-2 RNA in Wastewater Settled Solids at Eight  
333 Publicly Owned Treatment Works in Northern California Shows Strong Association with  
334 COVID-19 Incidence. *mSystems* **2021**, *0* (0), e00829-21.  
335 <https://doi.org/10.1128/mSystems.00829-21>.
- 336 (15) Topol, A.; Wolfe, M.; White, B.; Wigginton, K.; Boehm, A. High Throughput SARS-COV-2,  
337 PMMOV, and BCoV Quantification in Settled Solids Using Digital RT-PCR. *protocols.io*  
338 **2021**.
- 339 (16) Kitajima, M.; Sassi, H. P.; Torrey, J. R. Pepper Mild Mottle Virus as a Water Quality  
340 Indicator. *npj Clean Water* **2018**, *1* (1), 19. <https://doi.org/10.1038/s41545-018-0019-5>.
- 341 (17) Symonds, E. M.; Nguyen, K. H.; Harwood, V. J.; Breitbart, M. Pepper Mild Mottle Virus: A  
342 Plant Pathogen with a Greater Purpose in (Waste)Water Treatment Development and  
343 Public Health Management. *Water Research* **2018**, *144*, 1–12.  
344 <https://doi.org/10.1016/j.watres.2018.06.066>.
- 345 (18) McClary-Gutierrez, J. S.; Aanderud, Z. T.; Al-faliti, M.; Duvall, C.; Gonzalez, R.;  
346 Guzman, J.; Holm, R. H.; Jahne, M. A.; Kantor, R. S.; Katsivelis, P.; Kuhn, K. G.; Langan,  
347 L. M.; Mansfeldt, C.; McLellan, S. L.; Mendoza Grijalva, L. M.; Murnane, K. S.; Naughton,  
348 C. C.; Packman, A. I.; Paraskevopoulos, S.; Radniecki, T. S.; Roman, F. A.; Shrestha, A.;  
349 Stadler, L. B.; Steele, J. A.; Swalla, B. M.; Vikesland, P.; Wartell, B.; Wilusz, C. J.; Wong,  
350 J. C. C.; Boehm, A. B.; Halden, R. U.; Bibby, K.; Delgado Vela, J. Standardizing Data  
351 Reporting in the Research Community to Enhance the Utility of Open Data for SARS-  
352 CoV-2 Wastewater Surveillance. *Environ. Sci.: Water Res. Technol.* **2021**, *7* (9), 1545–  
353 1551. <https://doi.org/10.1039/D1EW00235J>.
- 354 (19) Borchardt, M. A.; Boehm, A. B.; Salit, M.; Spencer, S. K.; Wigginton, K. R.; Noble, R. T.  
355 The Environmental Microbiology Minimum Information (EMMI) Guidelines: QPCR and  
356 DPCR Quality and Reporting for Environmental Microbiology. *Environ. Sci. Technol.*

357           **2021**, 55 (15), 10210–10223. <https://doi.org/10.1021/acs.est.1c01767>.  
358    (20) Topol, A.; Wolfe, M.; White, B.; Wigginton, K.; Boehm, A. High Throughput Pre-Analytical  
359    Processing of Wastewater Settled Solids for SARS-CoV-2 RNA Analyses. *protocols.io*  
360    **2021**.  
361  
362

363  
364  
365

| Mutations |         | Sequence                                                 |
|-----------|---------|----------------------------------------------------------|
| LPPA24S   | Forward | GCCACTAGTCTCTAGTCAGTGTG                                  |
|           | Reverse | TGTCAGGGTAATAAACACCCACGT                                 |
|           | Probe   | CAGAACTCAATCATACTAATTCTTTTAC (5' FAM or HEX/ZEN/3' IBFQ) |
| S:477-505 | Forward | CTATCAGGCCGGTAACAAAC                                     |
|           | Reverse | ACTACTCTGTATGGTTGGTGAC                                   |
|           | Probe   | CCTTTACGATCATATRGTTTCCGACCC 5' FAM or HEX/ZEN/3' IBFQ)   |

366  
367  
368  
369  
370  
371  
372  
373

**Table 1.** Primers and probes for new mutation assays. Primers and probes for other assays that are previously published are in Table S5. Information on the fluorescent molecule and quenchers used for the probes are provided in parentheses after their sequence. FAM, 6-fluorescein amidite; HEX, hexachloro-fluorescein; ZEN, a proprietary internal quencher from IDT; IBFQ, Iowa Black FQ.

374

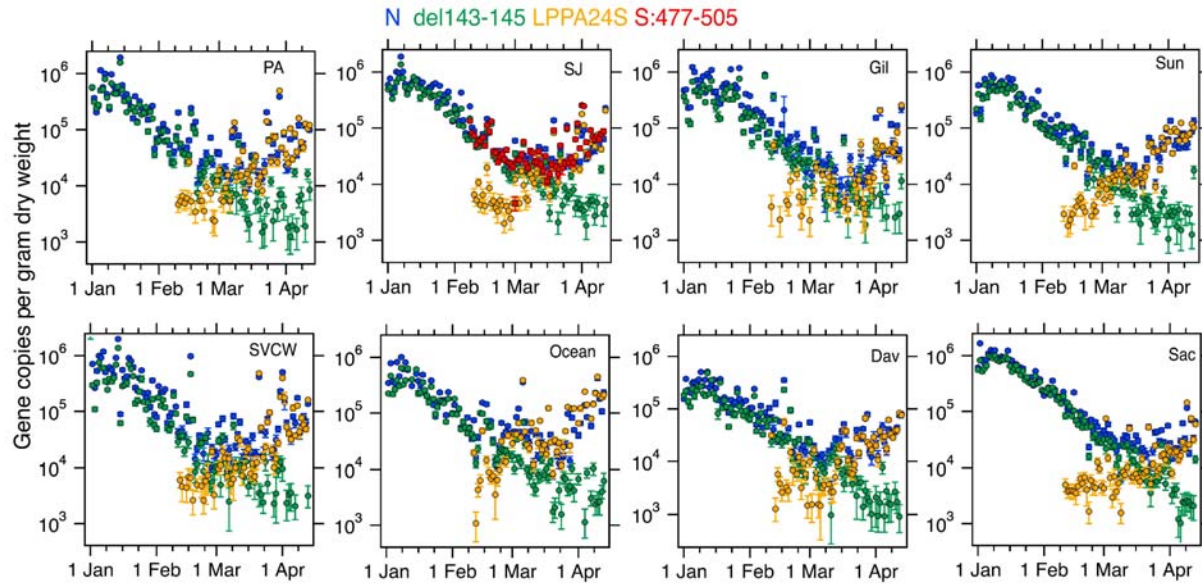

375  
376 **Figure 1.** Concentrations of N, del143-145, LPPA24S, and S:477-505 at 8 POTWs in the study  
377 (name indicated in corner). Error bars are 68% confidence intervals that include error from  
378 variation among 10 replicate wells, and Poisson error (“total error” as reported by the  
379 instrument). If error bars cannot be seen, they are smaller than the symbol.  
380

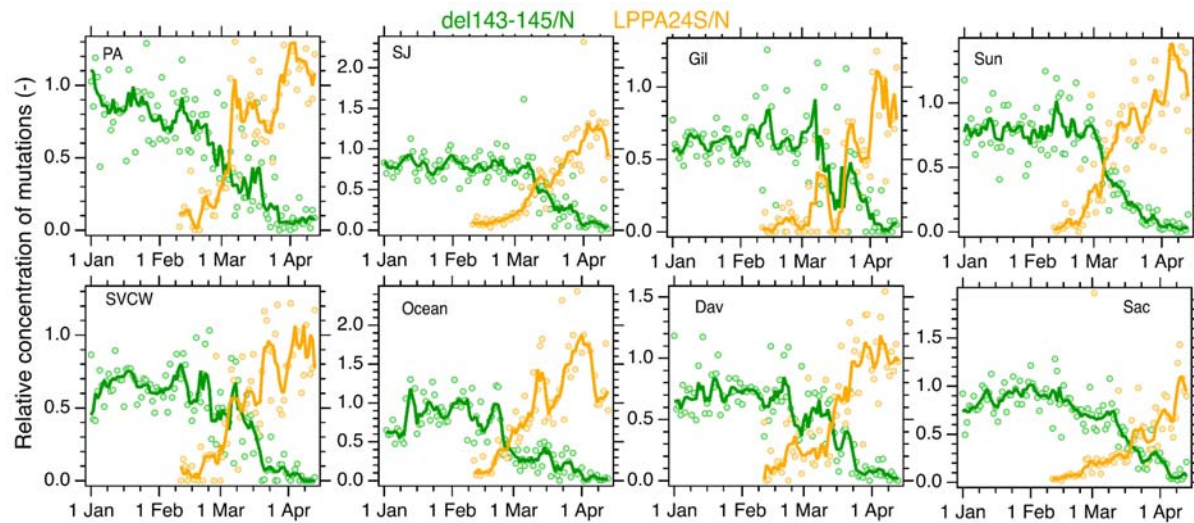

381  
382 **Figure 2.** Relative concentrations of del143-145 and LPPA24S (their concentrations normalized  
383 by the N gene) at 8 POTWs in the study (name indicated in corner). Markers are raw ratio  
384 values. Lines represent 5-day trimmed moving averages.  
385  
386  
387  
388



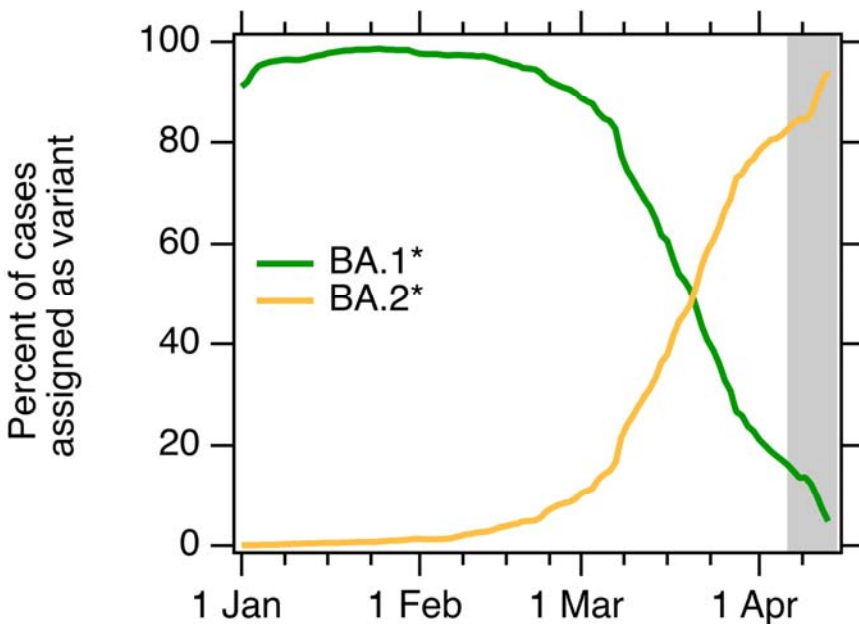

389  
390 Figure 3. Percentage of clinical cases in California classified as indicated BA.1\* and BA.2\* as a  
391 function of specimen collection date; data represent 7-d moving average as acquired from  
392 GISAID. Data available through 13 April when downloaded from GISAID on 21 April 2022. Gray  
393 area represents the time period for which data were incomplete on 14 April 2022, when  
394 wastewater measurements for the last date in our data series (12 or 13 April 2022) were  
395 available.
